# Supplementary material
Source: ML conference proceedings conference paper supplement (https://openreview.net/forum?id=uZi7H5Ac0X)
Supplement: supplementary_material [file attachment]

## Sheet: Hoja1
1	47	-5.99577		1	12	37.3549
2	58	-5.98293		2	23	37.3618
3	53	-5.98877		3	50	37.3789
4	97	-5.93742		4	13	37.3555
5	21	-6.02611		5	69	37.3909
6	135	-5.89307		6	115	37.4199
7	43	-6.00044		7	96	37.4079
8	42	-6.00161		8	53	37.3808
9	45	-5.9981		9	56	37.3826
10	39	-6.00511		10	56	37.3826
11	107	-5.92575		11	90	37.4041
12	30	-6.01561		12	100	37.4104
13	14	-6.03428		13	71	37.3921
14	62	-5.97826		14	72	37.3927
15	79	-5.95842		15	62	37.3864
16	65	-5.97476		16	63	37.3871
17	26	-6.02028		17	70	37.3915
18	58	-5.98293		18	48	37.3776
19	41.1667	-6.00258		19	81.5	37.3987
20	68.8	-5.97033		20	105.6	37.414
21	53.8	-5.98783		21	64.6	37.3881
22	116.5	-5.91466		22	93.75	37.4065
23	78.75	-5.95872		23	31.5	37.3672
24	17	-6.03078		24	50	37.3789
