# Supplementary material
Source: ML conference proceedings conference paper supplement (https://openreview.net/forum?id=uZi7H5Ac0X)
Supplement: supplementary_material [file population.xlsx]

## Sheet: Hoja1
1	12213
2	12213
3	14668
4	8304
5	12213
6	5307
7	12705
8	12213
9	12213
10	12059
11	5307
12	12213
13	7230
14	13191
15	9647
16	12059
17	10131
18	12213
19	15835
20	20633
21	16790
22	11992
23	15835
24	15835
